# Supplementary material
Source: PubMed Central journal article supplement (PMC3902468)
Supplement: NIHMS543681-supplement-Figure.pdf [file NIHMS543681-supplement-Figure.pdf]

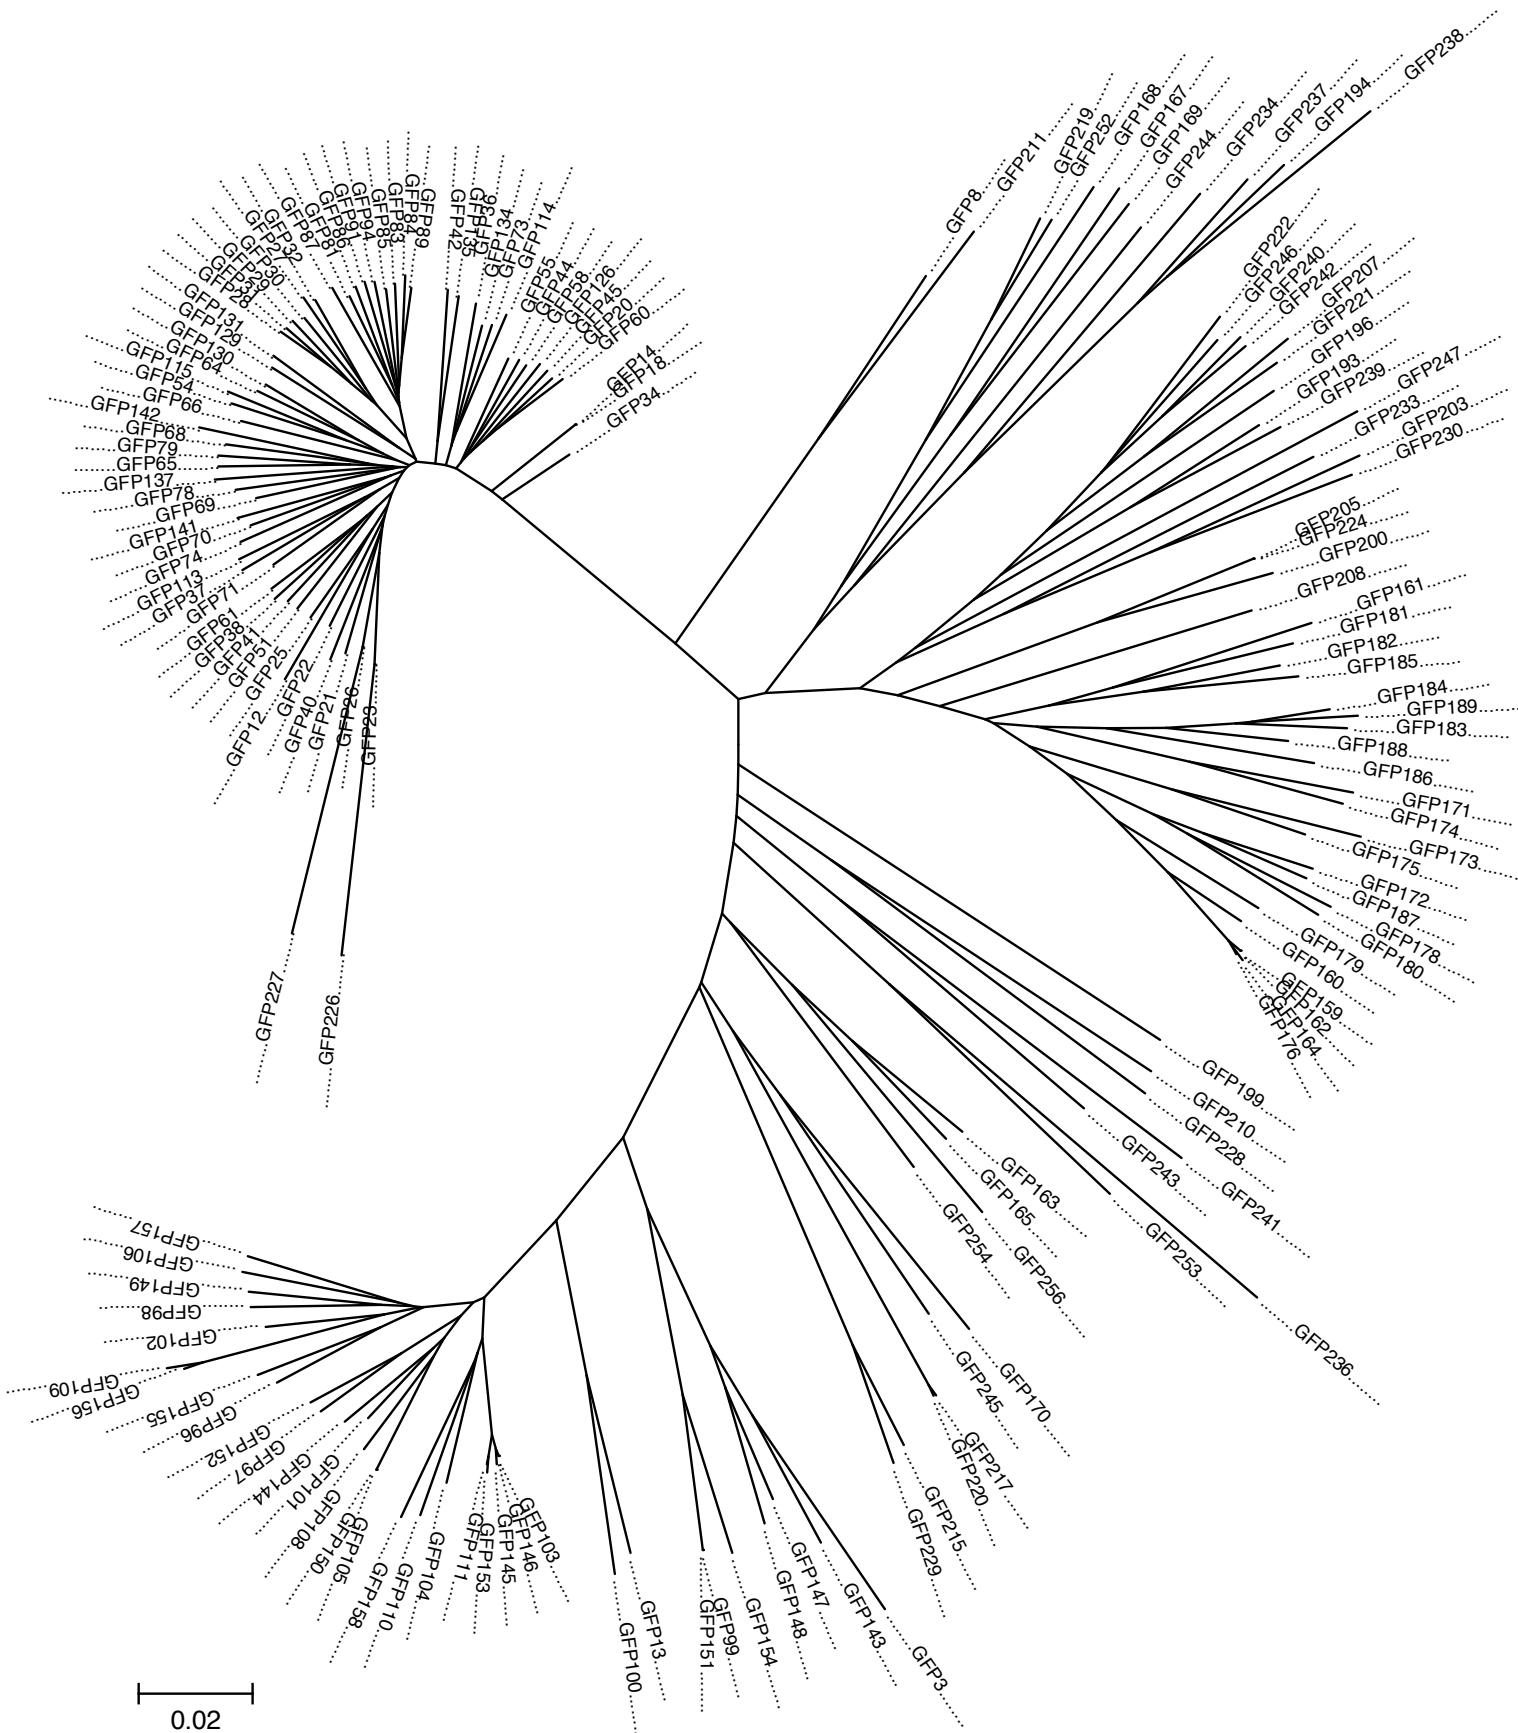

Supplementary Figure 1

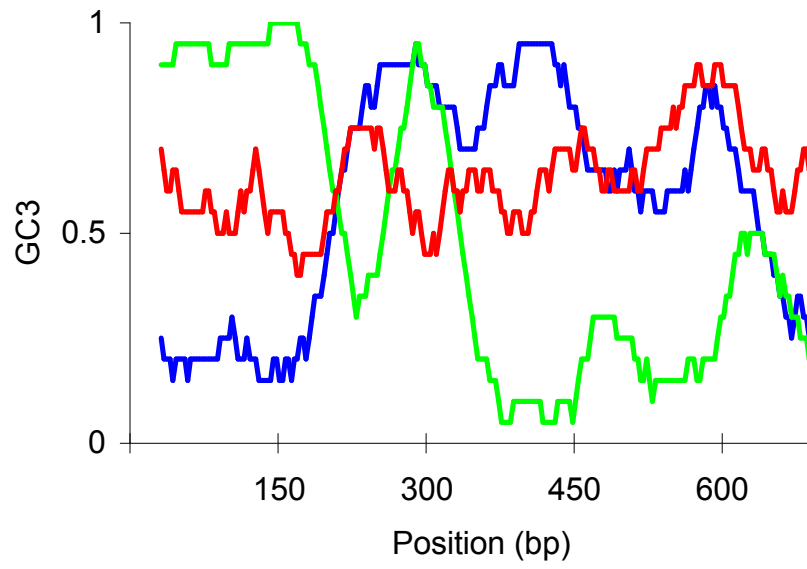

Supplementary Figure 2

A

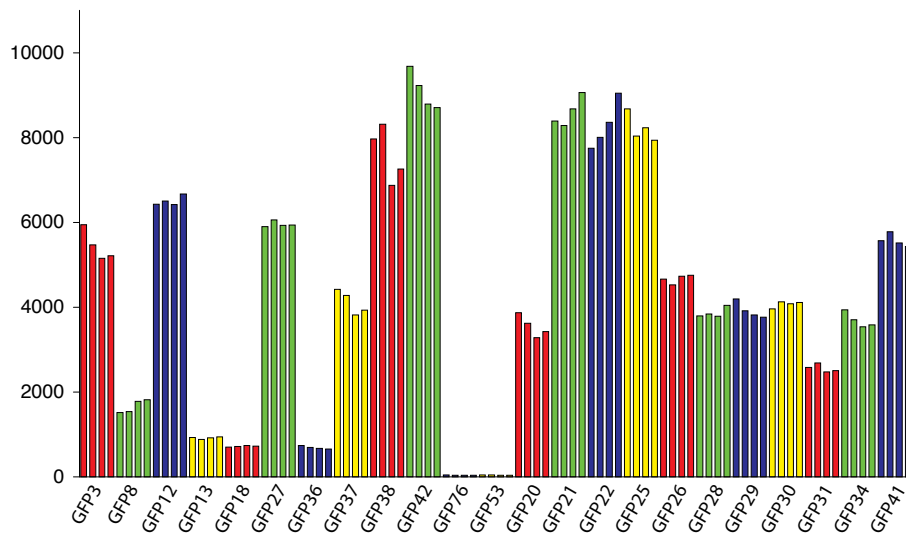

B

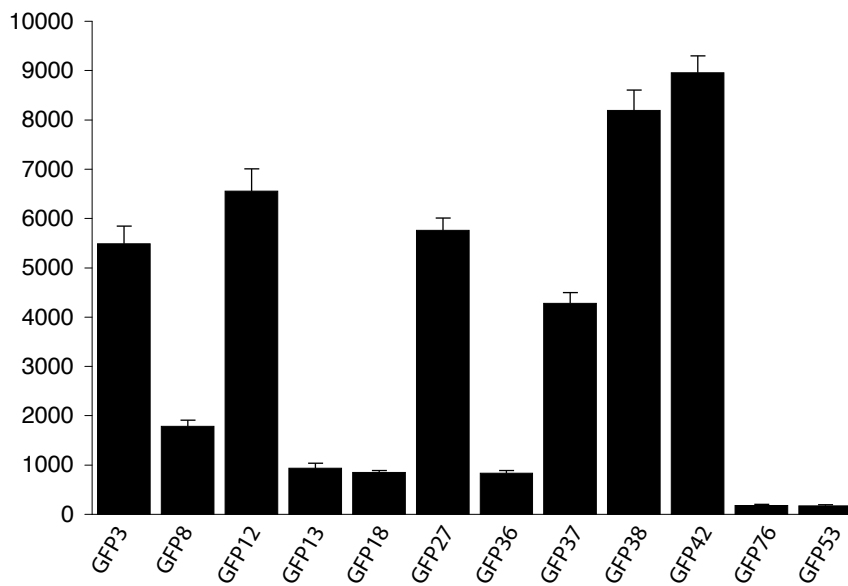

Supplementary Figure 3

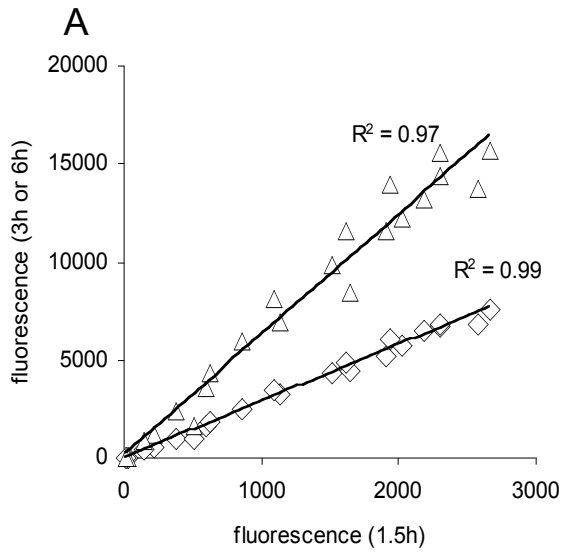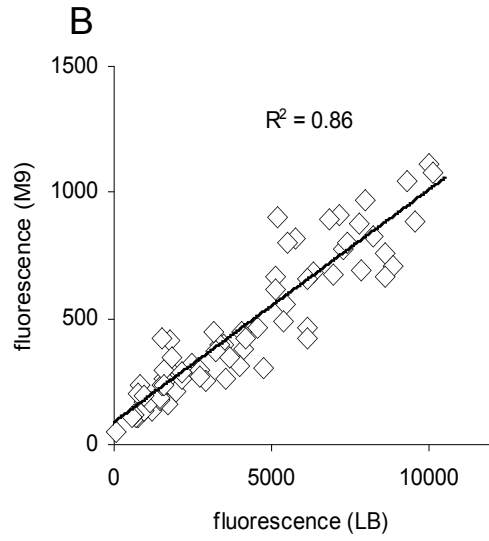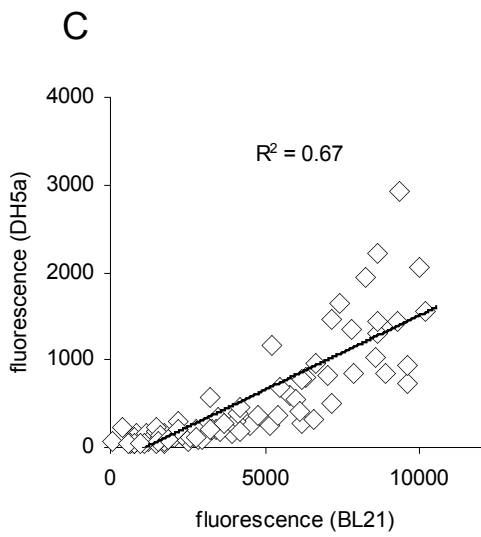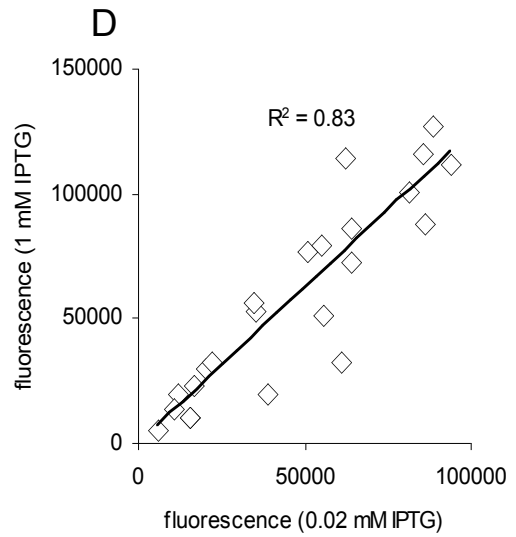

Supplementary Figure 4

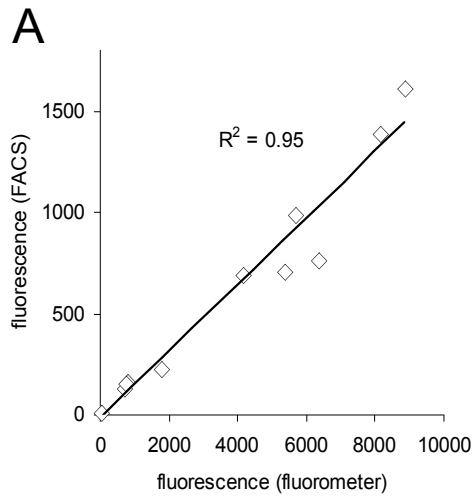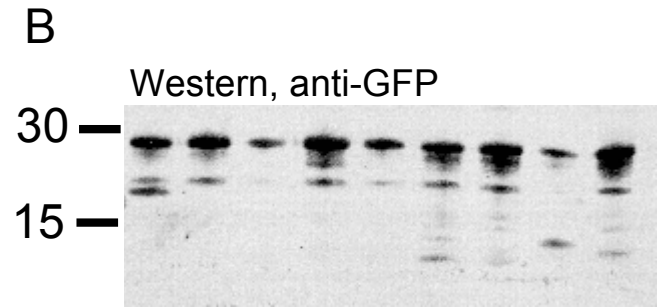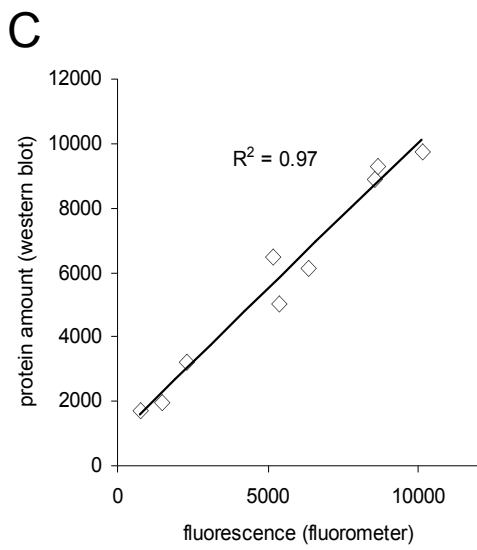

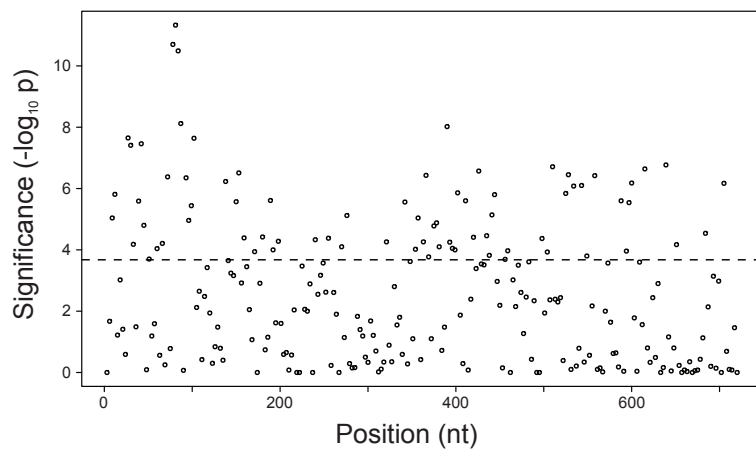

Supplementary Figure 6

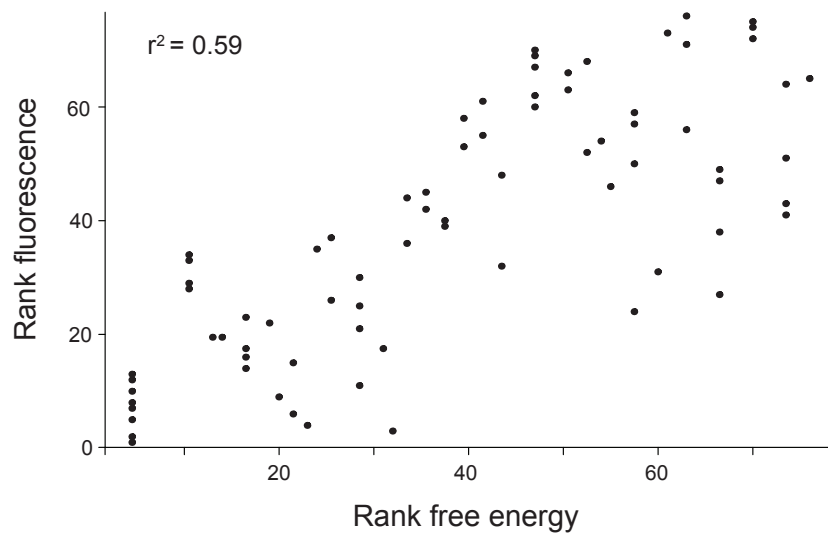

Supplementary Figure 7





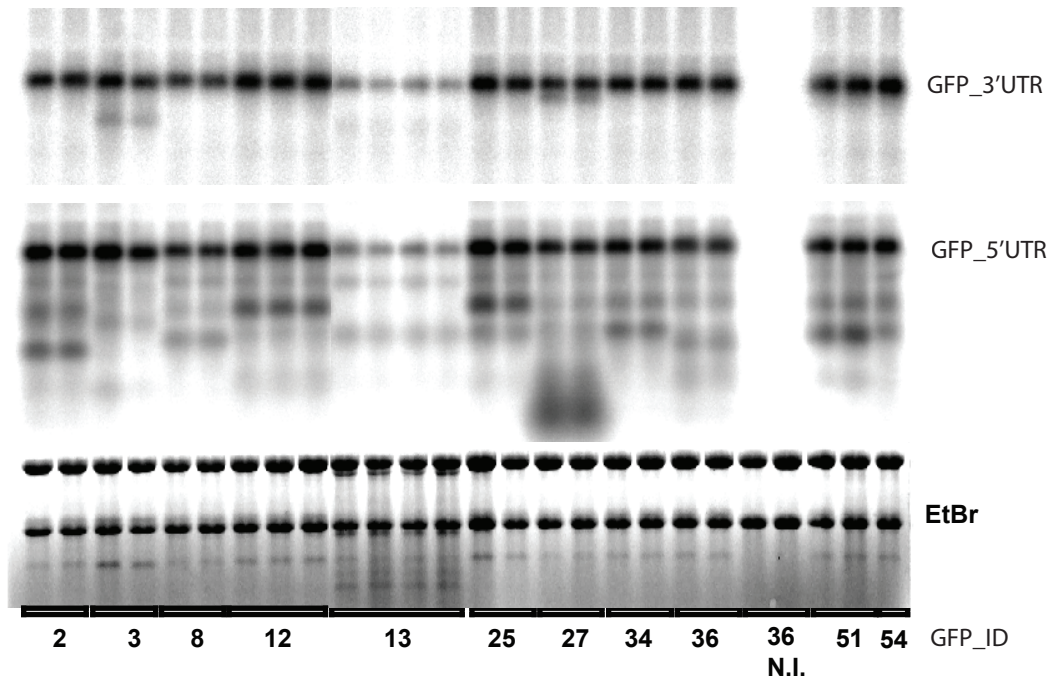

Supplementary Figure 9
